# Supplementary material for: Comparison of OCO-2 target observations to MUCCnet – Is it possible to capture urban X CO2 gradients from space?
Source: Copernicus journal article supplement (doi:10.5194/amt-2022-71), 2022-05-19
Supplement: Supplementary file [file amt-2022-71-RC2-supplement.pdf]

**Review of “Comparison of OCO-2 target observations to MUCCnet – Is it possible to capture urban XCO<sub>2</sub> gradients from space?” by Reißmann et al.**

The manuscript compares target viewing mode retrievals of total-column CO<sub>2</sub> from NASA’s Orbiting Carbon Observatory version 2 (OCO-2) to ground-based portable Fourier Transform Infrared Spectrometers (EM27/SUNs) within the Munich Urban Carbon Column network (MUCCnet). OCO-2 XCO<sub>2</sub> retrievals from larger-swath target observations are compared to average XCO<sub>2</sub> retrieved from MUCCnet ground-based sensors within the target viewing area for a number of comparison days. Furthermore, OCO-2 XCO<sub>2</sub> retrievals are also compared to ground-based EM27 XCO<sub>2</sub> to evaluate its ability to capture XCO<sub>2</sub> gradients within its target viewing area. Overall, the paper presents a valuable scientific contribution to Atmospheric Measurement Techniques and to the satellite community in general in evaluating the ability for OCO-2 to capture gradients within its target viewing mode region. I recommend publication after addressing the minor comments noted below.

General comments:

- There are a number of areas within the manuscript that refer to XCO<sub>2</sub> correctly in ppm, but then also refer to this quantity as both a concentration and/or a mixing ratio in various places within the text. The unit of ppm is a mole fraction and does not include a volume quantity, so please be cautious and consistent with the unit of XCO<sub>2</sub> (ppm) throughout the manuscript.
- In general, the manuscript is very well-written and concise, but there are a number of grammatical errors and typos within the manuscript that could be removed with more thorough editing. I have noted some corrections below in the technical comments.
- Figure 2: The units of XCO<sub>2</sub> are missing on subplots. It also looks like the target observations overlap quite a bit – how do you deal with this in the comparison methods and does averaging overlapping soundings affect your additional quality flag results in Figure 3? Similarly, Figure 15 is also missing XCO<sub>2</sub> units and overlapping observations make it difficult to compare to the model. Is it possible to average these observations in some way to better visualize this comparison?
- For the model comparison, it wasn’t clear within the text whether or not the WRF XCO<sub>2</sub> calculation takes into account the OCO-2 averaging kernel. Does it? Without doing so, the comparison between OCO-2 and the model is not a true 1:1 comparison.

Specific comments:

L24: please replace “concentrations” with “mole fractions”

L31: Reference is not valid and is also not included in the References section

L39: It would be worthwhile to state that the TCCON monitors the long-term atmospheric growth of total-column CO<sub>2</sub>, CO and CH<sub>4</sub>...

L54: I think that the 14-day repeat cycle is incorrect, isn't it 16 days?

L66: Some care should be taken here to define the scale at which OCO-2 may be able to resolve XCO<sub>2</sub> fluxes, which is dependent upon the spatial scale of the target itself.

L106: Because it is not possible to truly calibrate XCO<sub>2</sub>, it is somewhat misleading to call this quantity XCO<sub>2</sub> "calibrated". Rather, this is a bias-corrected and scaled XCO<sub>2</sub> retrieval that is presented.

L125: Please state to which CO<sub>2</sub> scale these retrievals are tied for the reader.

Figure 3 caption: Should "spectrometer locations [...]" be moved to Figure 2?

L138: Given the reference to Figure 2 and this statement, perhaps the order of Figure 2 and Figure 3 should be switched?

L144-155: Does the model XCO<sub>2</sub> calculation take into account the OCO-2 averaging kernel?

L172: Can you explain more how the collocation radius is chosen? Is this 6 km chosen to equally segment the target area around the EM27 sensors?

L192: Please include punctuation around equations here and elsewhere.

L226: Caution should be taken in stating that OCO-2 "measures" XCO<sub>2</sub> mole fractions. Rather, OCO-2 measures a radiance that is converted to a mole fraction of XCO<sub>2</sub> via a retrieval algorithm. In this sense, care should be taken to refer to XCO<sub>2</sub> from both ground-based and spaceborne instrumentation as "retrievals" here, in Figure 8, and elsewhere throughout the manuscript.

L247: Other potential causes for differences in biases are explained in L254-257, so perhaps it's worth moving this discussion to this paragraph.

Figure 11: These error bars look very small given the error bars in OCO-2 XCO<sub>2</sub> in Figure 9. Can you explain a bit more how you've calculated this error? In addition, given that the gradient in XCO<sub>2</sub> is very small, it might be worth indicating minor x-axis grid lines here for the reader.

L299: Given that the gradients presented in Figure 11 do not have overlapping error bars and therefore do not represent, qualitatively, similar mean XCO<sub>2</sub> differences, would it be more accurate to state that OCO-2 is capable of *detecting intra-target XCO<sub>2</sub> gradients of a similar sign as MUCNet XCO<sub>2</sub>*?

L327: Again, here I am wondering how the XCO<sub>2</sub> from the WRF model is computed because L144-155 does not describe whether or not this XCO<sub>2</sub> quantity derived takes into account the OCO-2 averaging kernel.

L331: 'mixing ratios' are described in this same sentence in addition to mole fractions. Please use mole fractions and maintain consistency throughout the manuscript.

L344: It would be useful either here or in a previous section to describe what "good measurement conditions" entails.

L345: Similar to L66, "middle" to "larger" sized cities might be irrelevant without a spatial scale. It would be helpful to state the spatial scale that you would expect OCO-2 to be able to resolve urban XCO<sub>2</sub> gradients, given the swath area of the target.

Technical comments:

L10: Please change "constraint" to "constrained"

L46-47: Consider rephrasing for readability

L93: ... determined "by" performing

L153: Please change "weighing" to "weighting"

L173: Please change "none" to "no"

L223: "Observing systems observe" is somewhat redundant.

L240: Please replace "due to the " with "by"

L290: Please replace "shows" with "shown"
